# Supplementary material
Source: publisher site journal article supplement (https://www.dovepress.com/article/440818)
Supplement: Supplementary file 1 [file Table-S1.pdf › Table-S1.pdf]

**Table S1** Questions of the international online survey to evaluate current options for subcutaneous injection of MTX and a new button-free MTX autoinjector

| No. | Question                                                                                                                                                                                                     | Answers                                                                                                                                                                                                                                                                                                                                                                                                                                                                                                                                                                                                                                                                                                                                                                                   |
|-----|--------------------------------------------------------------------------------------------------------------------------------------------------------------------------------------------------------------|-------------------------------------------------------------------------------------------------------------------------------------------------------------------------------------------------------------------------------------------------------------------------------------------------------------------------------------------------------------------------------------------------------------------------------------------------------------------------------------------------------------------------------------------------------------------------------------------------------------------------------------------------------------------------------------------------------------------------------------------------------------------------------------------|
| 1   | How satisfied are you with the pre-filled MTX pens that are currently available on the market (physicians/nurses) / the pen you currently use (patients)?                                                    | Scale ranging from<br>"Not at all satisfied = 1" to "Very satisfied = 10"                                                                                                                                                                                                                                                                                                                                                                                                                                                                                                                                                                                                                                                                                                                 |
| 2   | What specific medical arguments might advocate the use of an MTX pen as opposed to a pre-filled syringe (physicians/nurses)?                                                                                 | Open (in own words)                                                                                                                                                                                                                                                                                                                                                                                                                                                                                                                                                                                                                                                                                                                                                                       |
| 3   | What's your first impression of the new pre-filled MTX pen?                                                                                                                                                  | <ul style="list-style-type: none"> <li>- Positive</li> <li>- Ambivalent</li> <li>- Negative</li> <li>- Don't know yet</li> </ul>                                                                                                                                                                                                                                                                                                                                                                                                                                                                                                                                                                                                                                                          |
| 4   | How relevant to you are the following criteria of the new MTX pen?                                                                                                                                           | <ul style="list-style-type: none"> <li>- 2-step auto-injector (1. Remove cap; 2. Place on skin and push firmly - injection starts)</li> <li>- Small injection volume</li> <li>- Pen is available in 10 different doses (from 7.5mg - 30mg)</li> <li>- Less than 5 seconds injection time</li> <li>- Viewing window for the medication</li> <li>- Visual control of completed injection via marker in the viewing window</li> <li>- Audible signals at the beginning and end of injection</li> <li>- Hidden needle</li> <li>- Large label containing information on substance and dosage</li> <li>- Prominent colour code for different dosages</li> <li>- Angular pen shape</li> <li>- Pen components are produced in a CO<sub>2</sub>-neutral manner</li> <li>- Small package</li> </ul> |
| 5   | Where can you see the most relevant advantages of the new pre-filled MTX pen?<br>- Focus on some individual features of the new pre-filled MTX pen: Please select up to three major benefits of each feature | Different answers predefined for each feature as shown in Figure 2 with regard to the four most important features.                                                                                                                                                                                                                                                                                                                                                                                                                                                                                                                                                                                                                                                                       |
| 6   | How likely is it that you'd use this new pre-filled MTX pen?                                                                                                                                                 | <ul style="list-style-type: none"> <li>- Very likely</li> <li>- Likely</li> <li>- Undecided</li> <li>- Unlikely</li> <li>- Not likely at all</li> </ul>                                                                                                                                                                                                                                                                                                                                                                                                                                                                                                                                                                                                                                   |
| 7   | What would be your major concerns if the currently prescribed (physicians) or used (nurses/patients) MTX pen was replaced by the new pen?                                                                    | <ul style="list-style-type: none"> <li>- Cost/pricing</li> <li>- Difficulty in patient adoption / patient reluctance</li> <li>- Patient re-education / training need</li> <li>- Difficult/confusing to use</li> <li>- Doubts on efficacy</li> <li>- Questions on reliability</li> <li>- Safety</li> <li>- Availability in pharmacies / logistics</li> <li>- Other please specify</li> <li>- No concerns</li> <li>- Don't know</li> </ul>                                                                                                                                                                                                                                                                                                                                                  |
