# Supplementary material
Source: publisher site journal article supplement (https://www.dovepress.com/article/440818)
Supplement: Supplementary file 2 [file Table-S2.pdf › Table-S2.pdf]

**Table S2** Characteristics of physicians and nurses participating in the survey and satisfaction levels with MTX pens currently available on the market – results per country

|                                                                                                    | Physicians                 |                     |                      |                               |                      |                      | Nurses<br>(n=90)                         |                    |                    |
|----------------------------------------------------------------------------------------------------|----------------------------|---------------------|----------------------|-------------------------------|----------------------|----------------------|------------------------------------------|--------------------|--------------------|
|                                                                                                    | Rheumatologists<br>(n=189) |                     |                      | Dermatologists<br>(n=111)     |                      |                      |                                          |                    |                    |
| Country                                                                                            | D<br>(n=60)                | F<br>(n=60)         | UK<br>(n=69)         | D<br>(n=41)                   | F<br>(n=40)          | UK<br>(n=30)         | D<br>(n=30)                              | F<br>(n=30)        | UK<br>(n=30)       |
| Number of physicians predominantly practicing in hospital                                          | 3<br>(5%)                  | 31<br>(52%)         | 51<br>(74%)          | 0<br>(0%)                     | 27<br>(68%)          | 24<br>(80%)          | N/A                                      |                    |                    |
| Number of patients currently treated (average $\pm$ SD per respondent)                             | rheumatoid arthritis:      |                     |                      | moderate or severe psoriasis: |                      |                      | N/A                                      |                    |                    |
|                                                                                                    | 322.2<br>$\pm$ 280.8       | 128.8<br>$\pm$ 84.1 | 491.9<br>$\pm$ 318.1 | 269.0<br>$\pm$ 314.3          | 178.0<br>$\pm$ 133.8 | 236.0<br>$\pm$ 370.9 |                                          |                    |                    |
| Number of patients within the last 3 months with prescription of (average $\pm$ SD per respondent) | rheumatoid arthritis:      |                     |                      | moderate or severe psoriasis: |                      |                      | mainly adults with rheumatoid arthritis: |                    |                    |
|                                                                                                    |                            |                     |                      |                               |                      |                      |                                          |                    |                    |
| Oral MTX                                                                                           | 55.5<br>$\pm$ 46.1         | 33.9<br>$\pm$ 24.8  | 132.8<br>$\pm$ 152.3 | 19.2<br>$\pm$ 47.0            | 22.9<br>$\pm$ 35.2   | 36.3<br>$\pm$ 24.9   | N/A                                      |                    |                    |
| MTX syringe                                                                                        | 36.0<br>$\pm$ 37.0         | 10.2<br>$\pm$ 13.4  | 15.2<br>$\pm$ 25.2   | 16.3<br>$\pm$ 32.4            | 13.6<br>$\pm$ 20.1   | 10.0<br>$\pm$ 15.4   | N/A                                      |                    |                    |
| MTX pen                                                                                            | 67.1<br>$\pm$ 81.9         | 32.5<br>$\pm$ 26.0  | 48.7<br>$\pm$ 57.3   | 24.5<br>$\pm$ 33.1            | 31.3<br>$\pm$ 34.1   | 20.9<br>$\pm$ 20.1   | 30.4<br>$\pm$ 29.9                       | 19.7<br>$\pm$ 12.7 | 56.3<br>$\pm$ 24.9 |
| - metoject®/metex® PEN                                                                             | 46.8<br>$\pm$ 66.6         | 21.9<br>$\pm$ 21.8  | 38.7<br>$\pm$ 54.1   | 17.8<br>$\pm$ 18.4            | 21.8<br>$\pm$ 26.1   | 15.8<br>$\pm$ 13.6   | N/A                                      |                    |                    |
| - Nordimet® pre-filled pen                                                                         | 18.3<br>$\pm$ 18.6         | 14.3<br>$\pm$ 16.1  | 8.8<br>$\pm$ 17.7    | 6.8<br>$\pm$ 16.5             | 12.3<br>$\pm$ 19.7   | 5.0<br>$\pm$ 12.8    | N/A                                      |                    |                    |
| - Methofill® pre-filled injector                                                                   | N/A                        | 1.7<br>$\pm$ 6.8    | 4.7<br>$\pm$ 15.4    | N/A                           | 7.1<br>$\pm$ 17.2    | 4.3<br>$\pm$ 10.6    | N/A                                      |                    |                    |
| Number of physicians/nurses who have ever prescribed/trained in use <sup>a</sup>                   |                            |                     |                      |                               |                      |                      |                                          |                    |                    |
| - metoject®/metex® PEN                                                                             | 55<br>(92%)                | 60<br>(100%)        | 65<br>(94%)          | 41<br>(100%)                  | 36<br>(90%)          | 29<br>(97%)          | 30<br>(100%)                             | 25<br>(83%)        | 25<br>(83%)        |
| - Nordimet® pre-filled pen                                                                         | 51<br>(85%)                | 60<br>(100%)        | 39<br>(57%)          | 16<br>(39%)                   | 30<br>(75%)          | 10<br>(33%)          | 24<br>(80%)                              | 24<br>(80%)        | 21<br>(70%)        |
| - Methofill® pre-filled injector                                                                   | 0<br>(0%)                  | 8<br>(13%)          | 14<br>(20%)          | 0<br>(0%)                     | 4<br>(10%)           | 11<br>(37%)          | 0<br>(0%)                                | 11<br>(37%)        | 15<br>(50%)        |
| Satisfaction level                                                                                 |                            |                     |                      |                               |                      |                      |                                          |                    |                    |
| Average $\pm$ SD                                                                                   | 8.1<br>$\pm$ 1.4           | 8.1<br>$\pm$ 1.2    | 7.4<br>$\pm$ 1.1     | 8.1<br>$\pm$ 1.5              | 8.4<br>$\pm$ 1.1     | 7.2<br>$\pm$ 1.5     | 7.8<br>$\pm$ 1.0                         | 8.1<br>$\pm$ 1.0   | 8.1<br>$\pm$ 1.4   |
| Number of responses with                                                                           |                            |                     |                      |                               |                      |                      |                                          |                    |                    |
| Low satisfaction level (1 or 2)                                                                    | 0<br>(0%)                  | 0<br>(0%)           | 0<br>(0%)            | 0<br>(0%)                     | 0<br>(0%)            | 0<br>(0%)            | 0<br>(0%)                                | 0<br>(0%)          | 0<br>(0%)          |
| Top satisfaction level (9 or 10)                                                                   | 21<br>(35%)                | 18<br>(30%)         | 8<br>(12%)           | 16<br>(39%)                   | 18<br>(45%)          | 4<br>(13%)           | 7<br>(23%)                               | 10<br>(33%)        | 13<br>(43%)        |

**Notes:** <sup>a</sup> The percentages determined for each device were influenced by the inclusion criteria (see method section)

**Abbreviations:** D, Germany; F, France; UK, United Kingdom; N/A, not applicable; SD, standard deviation
