# Supplementary material
Source: publisher site journal article supplement (https://www.dovepress.com/article/440818)
Supplement: Supplementary file 3 [file Table-S3.pdf › Table-S3.pdf]

**Table S3** Characteristics of patients participating in the survey and satisfaction level with MTX pens currently available on the market

|                                         | Rheumatoid Arthritis<br>(n=92) |              |              | Moderate or Severe Psoriasis<br>(n=88) |              |              |
|-----------------------------------------|--------------------------------|--------------|--------------|----------------------------------------|--------------|--------------|
| Country                                 | D<br>(n=32)                    | F<br>(n=30)  | UK<br>(n=30) | D<br>(n=30)                            | F<br>(n=30)  | UK<br>(n=28) |
| Females                                 | 16 (50%)                       | 15 (50%)     | 19 (63%)     | 18 (60%)                               | 15 (50%)     | 17 (61%)     |
| Age                                     |                                |              |              |                                        |              |              |
| < 40 years                              | 8 (25%)                        | 14 (47%)     | 12 (40%)     | 7 (23%)                                | 14 (47%)     | 14 (50%)     |
| 40 – 59 years                           | 16 (50%)                       | 12 (40%)     | 11 (37%)     | 19 (63%)                               | 13 (43%)     | 8 (29%)      |
| ≥ 60 years                              | 8 (25%)                        | 4 (13%)      | 7 (23%)      | 4 (13%)                                | 3 (10%)      | 6 (21%)      |
| Type of device used:                    |                                |              |              |                                        |              |              |
| metoject®/metex® PEN                    | 24 (75%)                       | 15 (50%)     | 17 (57%)     | 20 (67%)                               | 12 (40%)     | 11 (39%)     |
| Nordimet® pre-filled pen                | 14 (44%)                       | 17 (57%)     | 15 (50%)     | 14 (47%)                               | 18 (60%)     | 16 (57%)     |
| Methofill® pre-filled injector          | 0                              | 5 (17%)      | 3 (10%)      | 0                                      | 9 (30%)      | 6 (21%)      |
| Self-injection                          |                                |              |              |                                        |              |              |
| Always                                  | 30 (94%)                       | 19 (63%)     | 26 (87%)     | 24 (80%)                               | 21 (70%)     | 23 (82%)     |
| Mostly                                  | 2 (6%)                         | 11 (37%)     | 4 (13%)      | 6 (20%)                                | 9 (30%)      | 5 (18%)      |
| Duration of using a device <sup>a</sup> |                                |              |              |                                        |              |              |
| > 3 months but up to 6 months           | 0                              | 0            | 0            | 7 (23%)                                | 1 (3%)       | 5 (18%)      |
| > 6 months                              | 32 (100%)                      | 30 (100%)    | 30 (100%)    | 23 (77%)                               | 29 (97%)     | 23 (82%)     |
| Satisfaction level                      |                                |              |              |                                        |              |              |
| Average ± SD                            | 8.8<br>± 1.5                   | 8.1<br>± 1.5 | 7.9<br>± 2.1 | 7.9<br>± 1.7                           | 7.6<br>± 2.3 | 7.7<br>± 1.7 |
| Number of responses with                |                                |              |              |                                        |              |              |
| low satisfaction level (1 or 2)         | 0 (0%)                         | 0            | 0            | 0                                      | 2 (7%)       | 0            |
| top satisfaction level (9 or 10)        | 20 (63%)                       | 11 (37%)     | 15 (50%)     | 10 (33%)                               | 11 (37%)     | 9 (32%)      |

**Notes:** <sup>a</sup> Duration of using a pen influenced by inclusion criteria (see method section)

**Abbreviations:** D, Germany; F, France; UK, United Kingdom; SD, standard deviation
